# Supplementary material for: Three genetic–environmental networks for human personality
Source: PubMed Central journal article supplement (PMC8550959; doi:10.1038/s41380-019-0579-x), 2019-11-21
Supplement: 41380_2019_579_MOESM3_ESM.pdf [file 41380_2019_579_MOESM3_ESM.pdf]

A

% of Associations

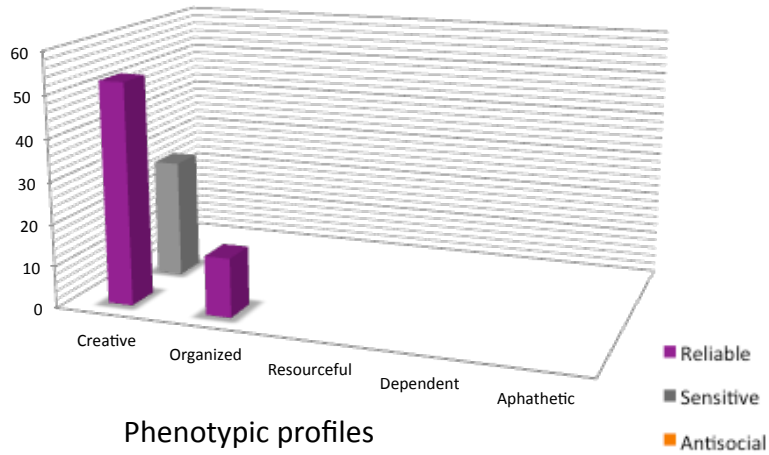

B

% of Associations

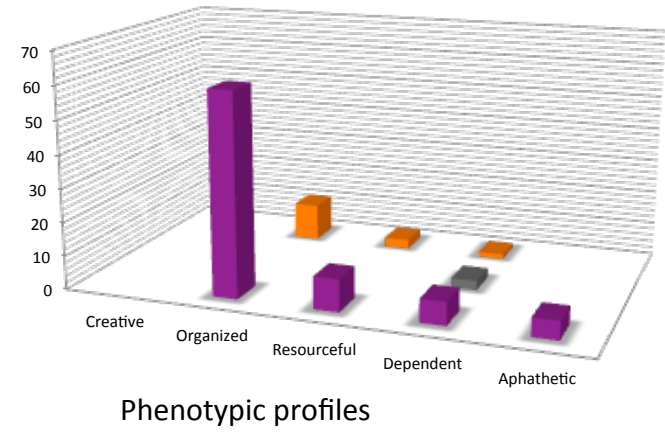

C

% of Associations

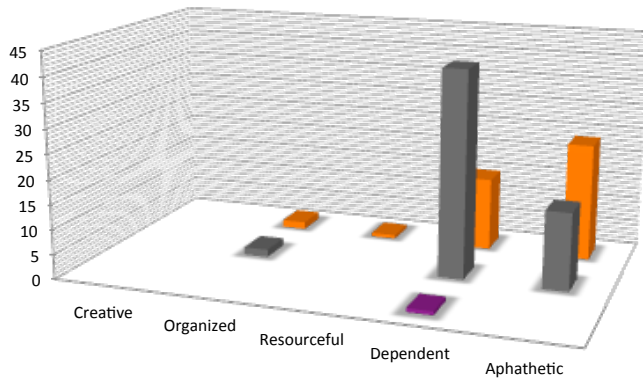

D

Temperament profiles

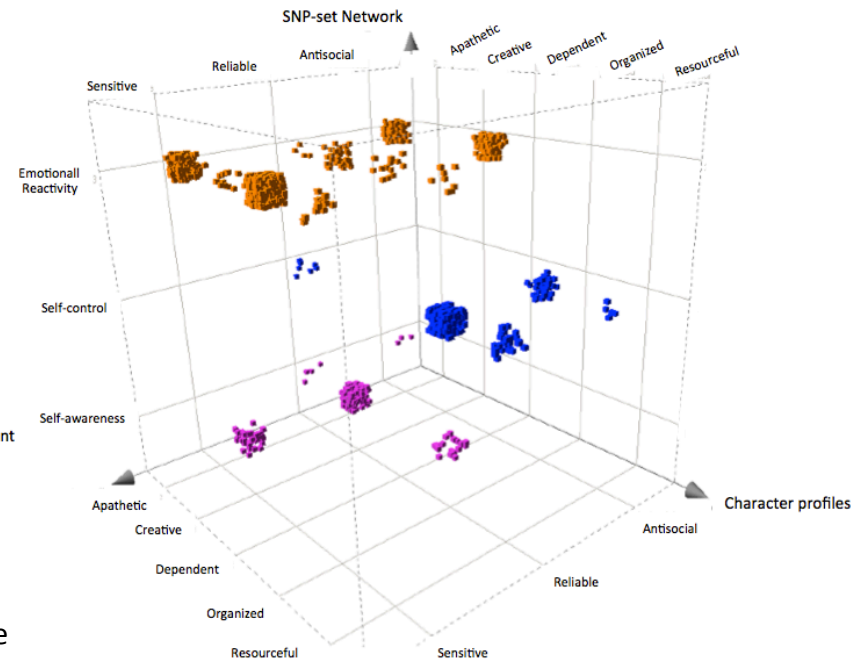

- Creative-Reliable
- Organized-Reliable
- Emotional-Unreliable

Figure S2
