# Supplementary material for: Three genetic–environmental networks for human personality
Source: PubMed Central journal article supplement (PMC8550959; doi:10.1038/s41380-019-0579-x), 2019-11-21
Supplement: 41380_2019_579_MOESM4_ESM.pdf [file 41380_2019_579_MOESM4_ESM.pdf]

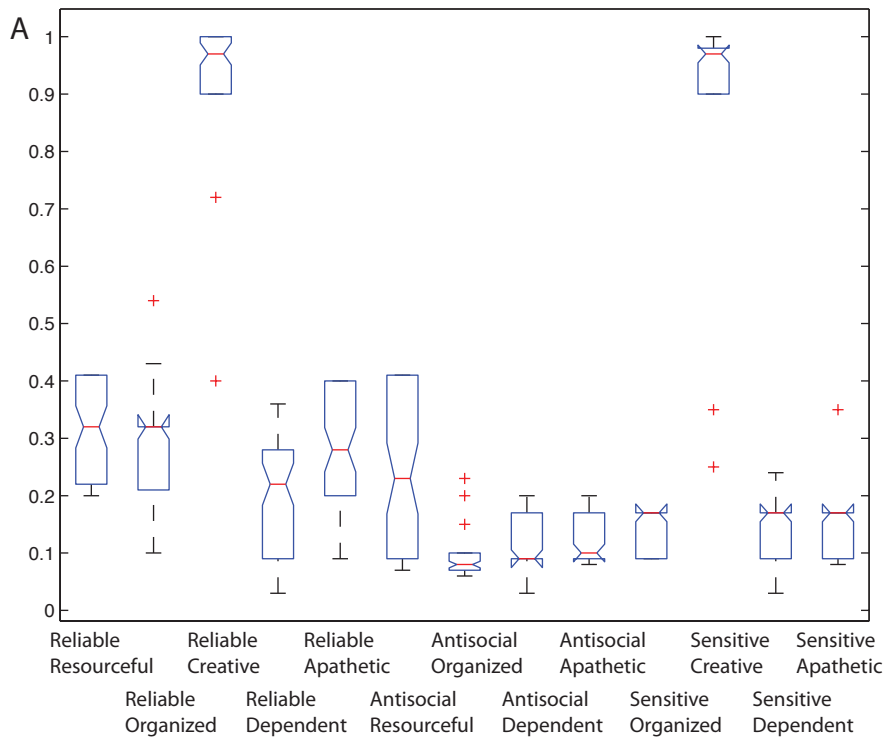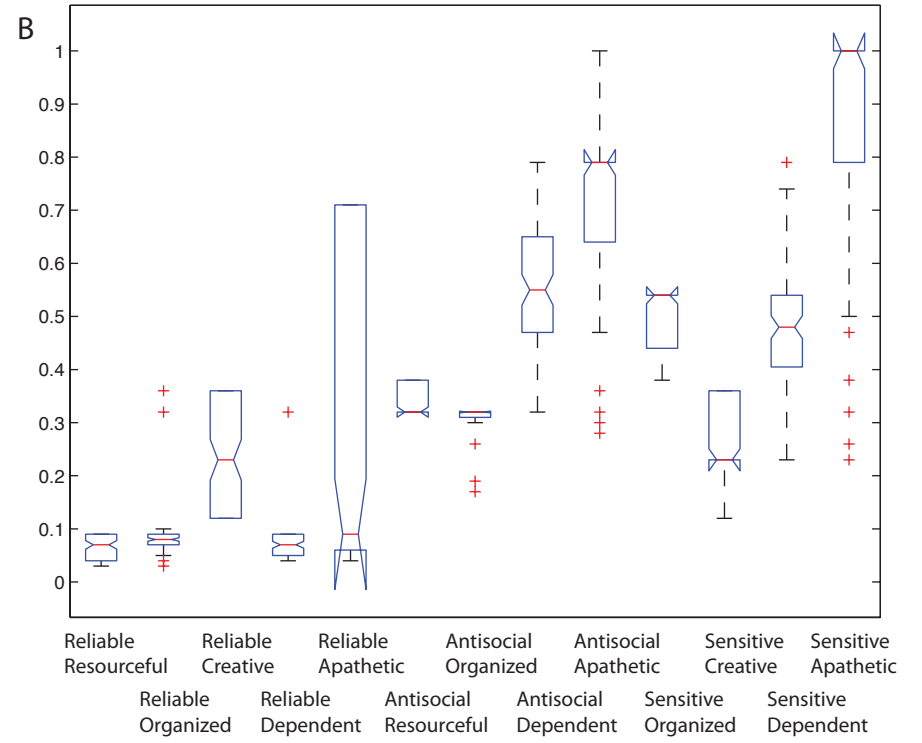

Figure S3
